# Supplementary material
Source: PubMed Central journal article supplement (PMC10259240)
Supplement: EIJ-D-21-00651_Ortega-Paz_SD.pdf [file EIJ-D-21-00651_Ortega-Paz_SD.pdf]

## Supplementary data

**Supplementary Table 1. Yearly dual antiplatelet therapy prescription rate in the MAGSTEMI trial according to allocation.**

|        | <b>MgBRS<br/>(n=74)</b> | <b>SES<br/>(n=76)</b> | <b>Difference (95% CI)</b> | <b>p-value</b> |
|--------|-------------------------|-----------------------|----------------------------|----------------|
| 1-year | 4 (5.4%)                | 2 (2.6%)              | -2.8 (-9.1 to 3.5)         | 0.386          |
| 2-year | 6 (8.1%)                | 2 (2.6%)              | 5.5 (-12.7 to 1.7)         | 0.136          |
| 3-year | 7 (9.5)                 | 3 (3.9)               | -5.5 (-13.5 to 2.5)        | 0.176          |

95% CI: 95% confidence interval; MgBRS: magnesium-based bioresorbable scaffold; SES: permanent metallic sirolimus-eluting stent

**Supplementary Table 2. Bleeding events at 3-year follow-up according to allocated device and antiplatelet therapy at the moment of the event.**

| <b>Patient</b> | <b>Device</b> | <b>Time to event (months)</b> | <b>Antiplatelet therapy at the moment of the event</b> |
|----------------|---------------|-------------------------------|--------------------------------------------------------|
| 1              | MgBRS         | 1.0                           | Aspirin+clopidogrel                                    |
| 2              | MgBRS         | 3.2                           | Aspirin                                                |
| 3              | MgBRS         | 3.3                           | Aspirin+clopidogrel                                    |
| 4              | SES           | 4.5                           | Aspirin                                                |
| 5              | MgBRS         | 5.9                           | Aspirin+ticagrelor                                     |
| 6              | SES           | 10.6                          | Aspirin+prasugrel                                      |
| 7              | MgBRS         | 18.3                          | Aspirin                                                |
| 8              | MgBRS         | 20.2                          | Aspirin                                                |
| 9              | SES           | 25.6                          | Aspirin+ticagrelor                                     |
| 10             | MgBRS         | 27.7                          | Aspirin                                                |

MgBRS: magnesium-based bioresorbable scaffold; SES: permanent metallic sirolimus-eluting stent

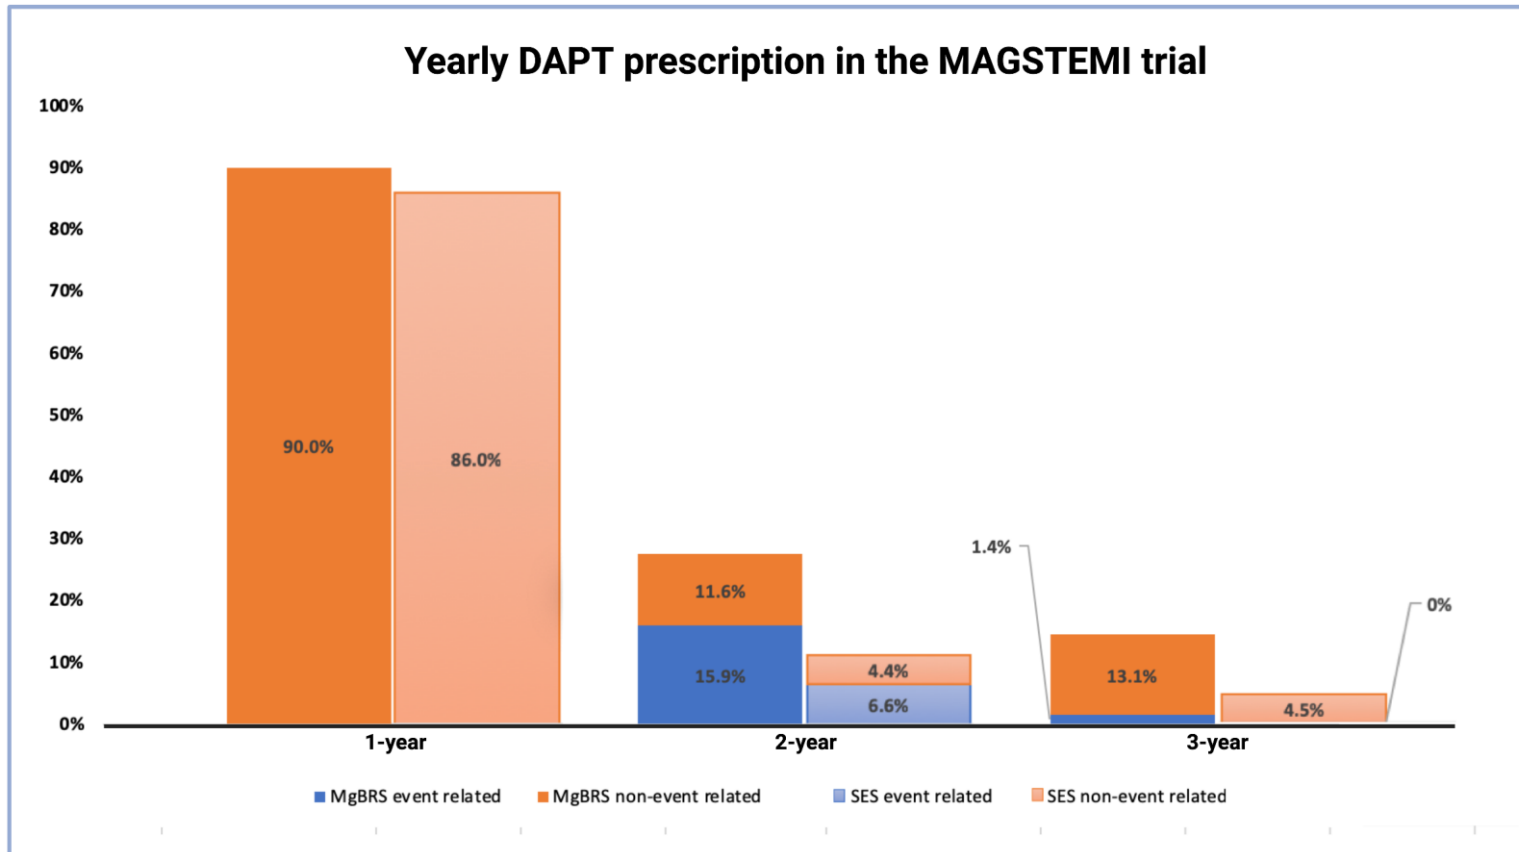

**Supplementary Figure 1.** Yearly dual antiplatelet therapy prescription in the MAGSTEMI trial according to its relationship with adverse events and allocation.

DAPT: dual antiplatelet therapy; MgBRS: magnesium-based bioresorbable scaffold; SES: permanent metallic sirolimus-eluting stent
